# Supplementary material for: Convergent antibody responses to the SARS-CoV-2 spike protein in convalescent and vaccinated individuals
Source: bioRxiv or medRxiv preprint supplement (doi:10.1101/2021.05.02.442326), 2021-05-03
Supplement: Supplementary file [file media-1.pdf]

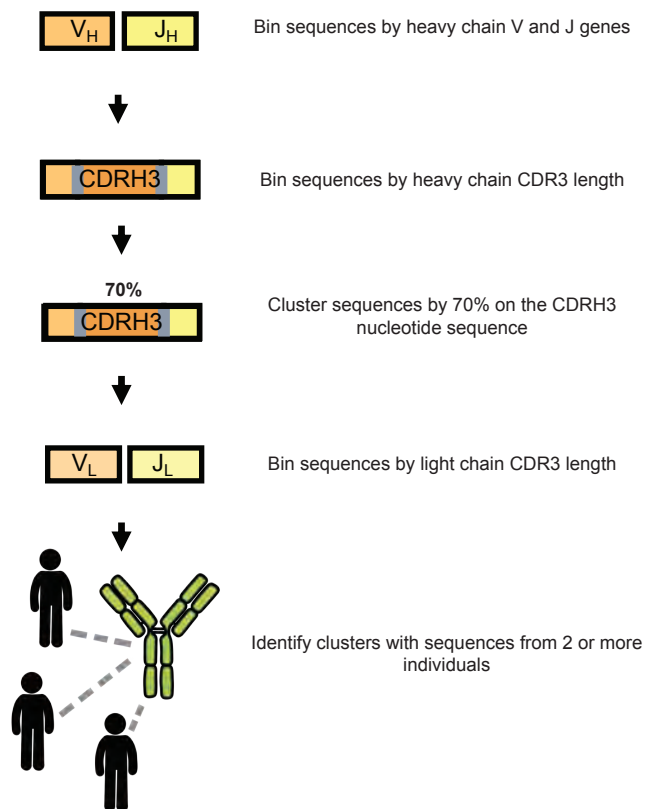

a

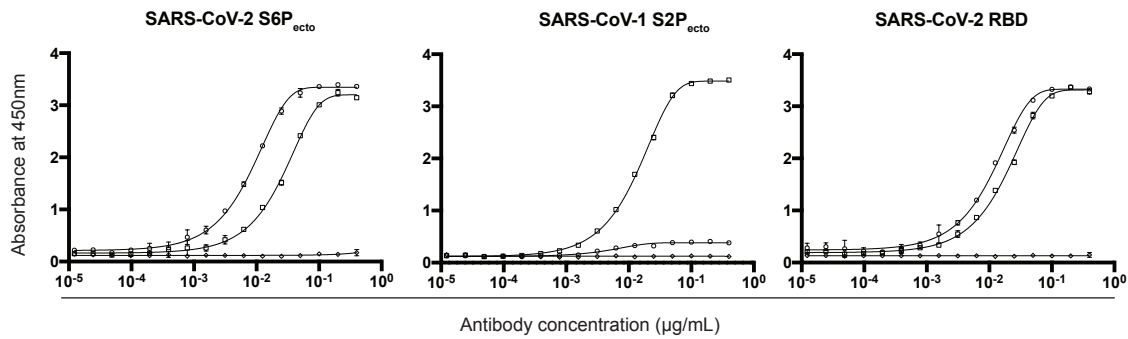

Human mAb

—○— COV2-2381

—□— rCR3022

—△— DENV 2D22

b

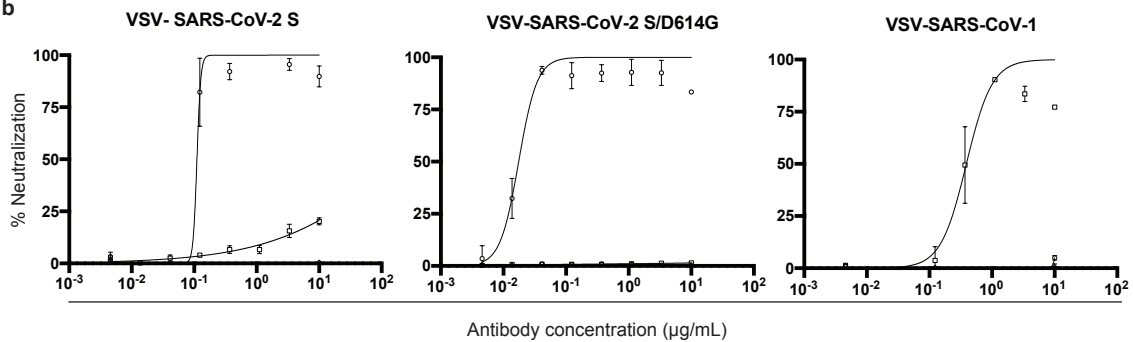

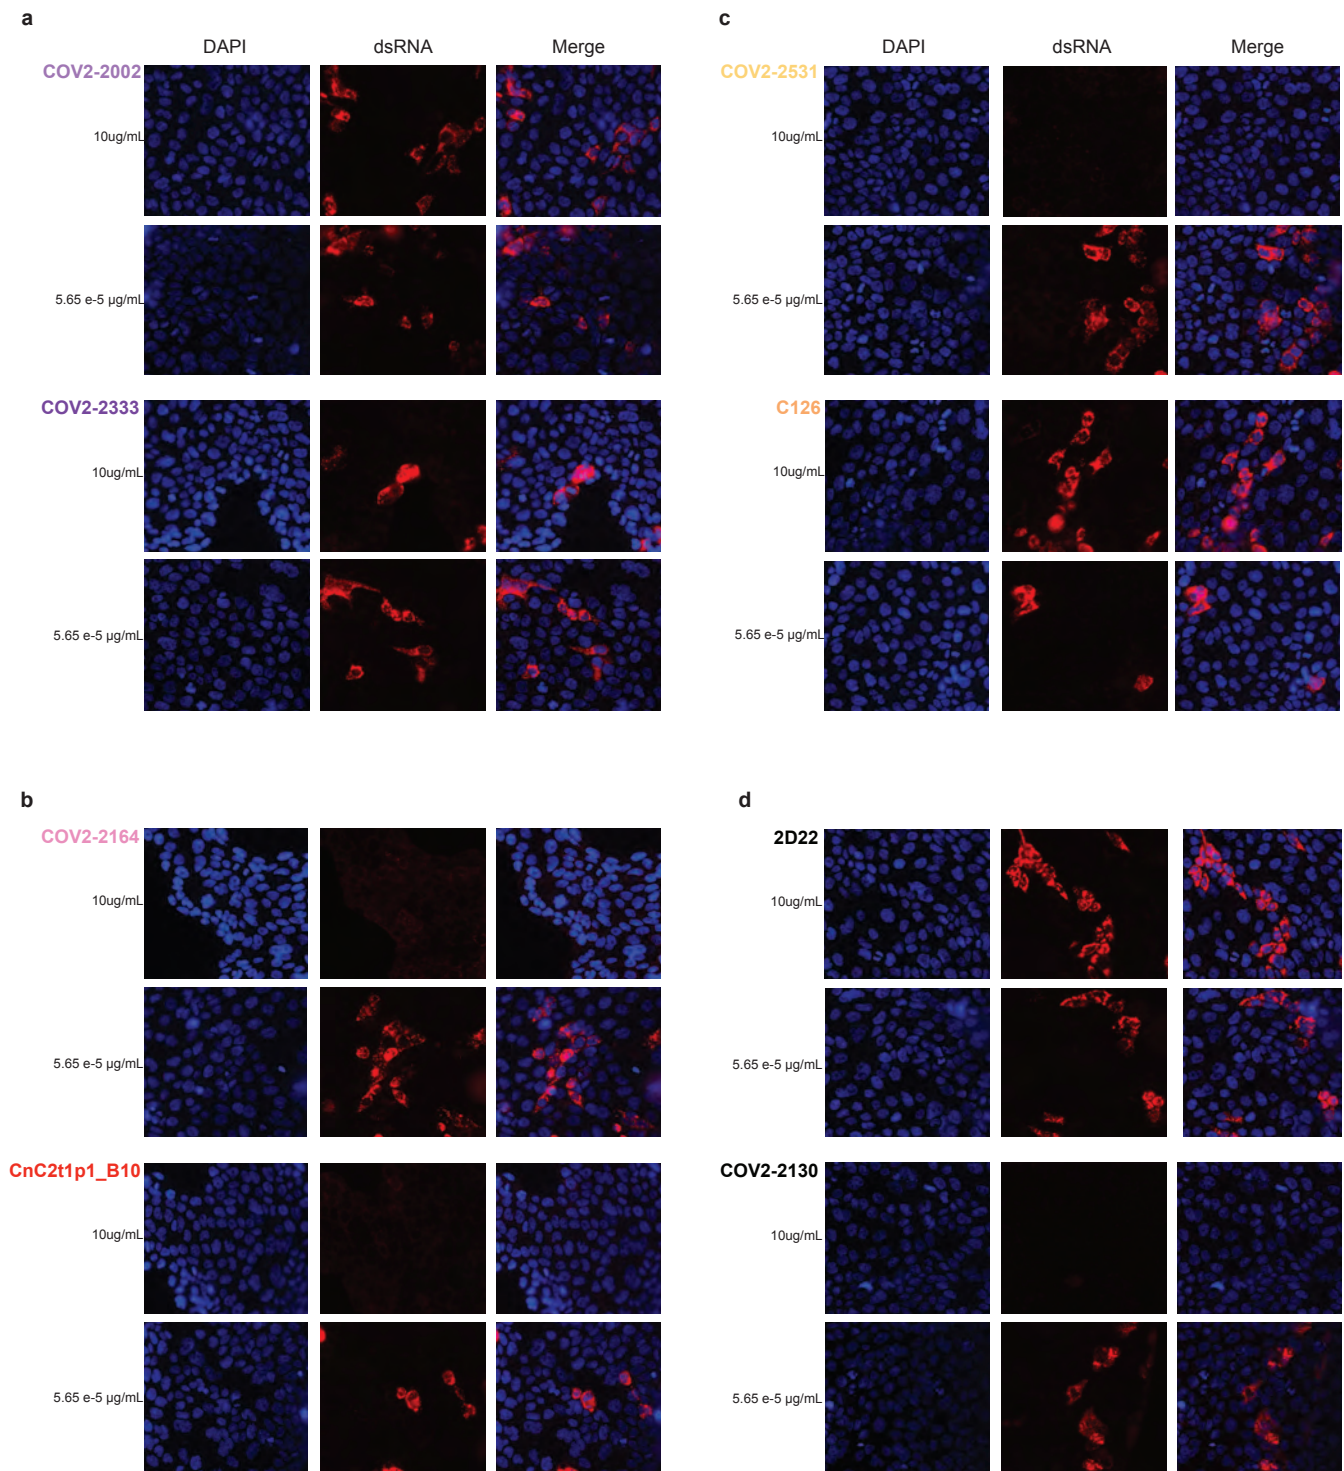

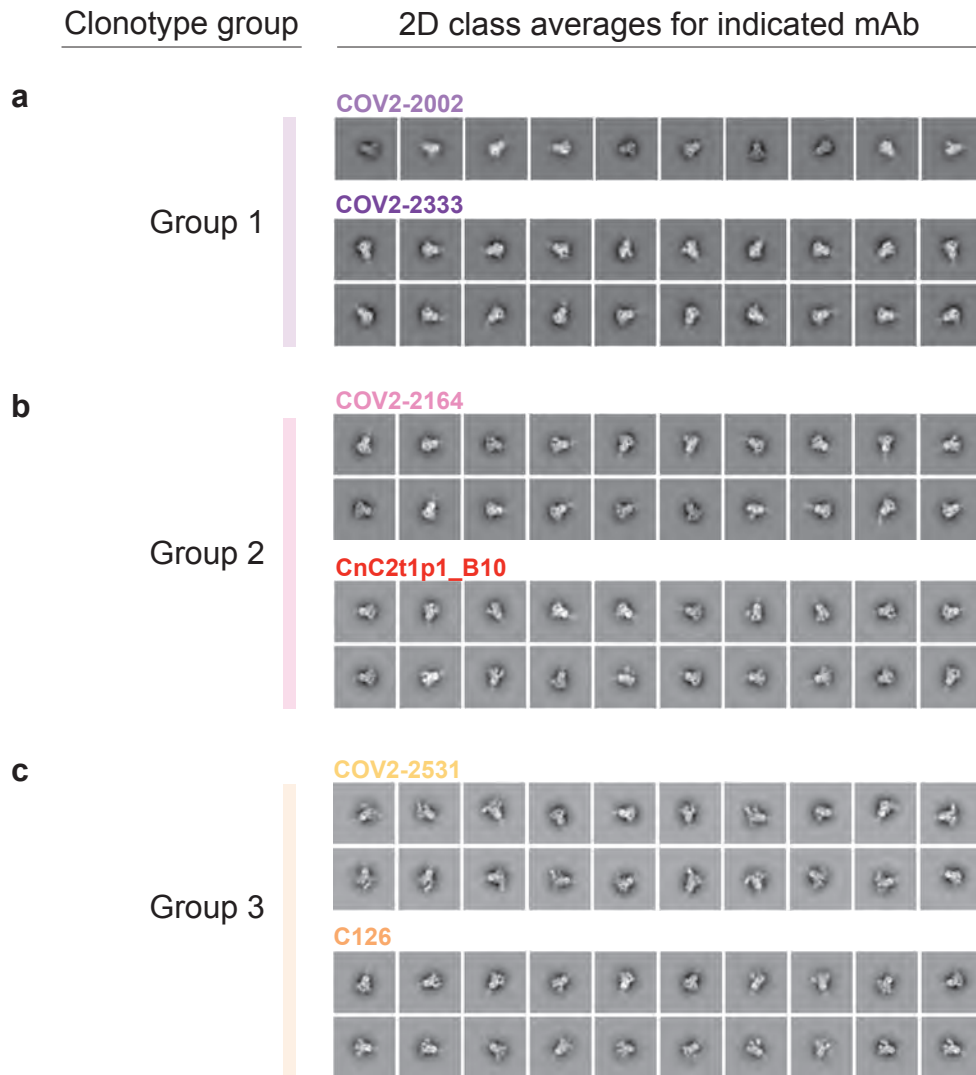

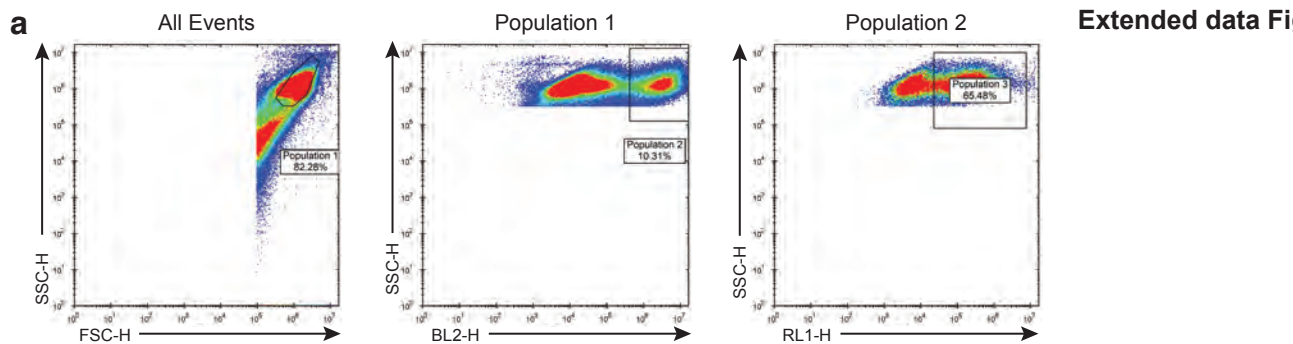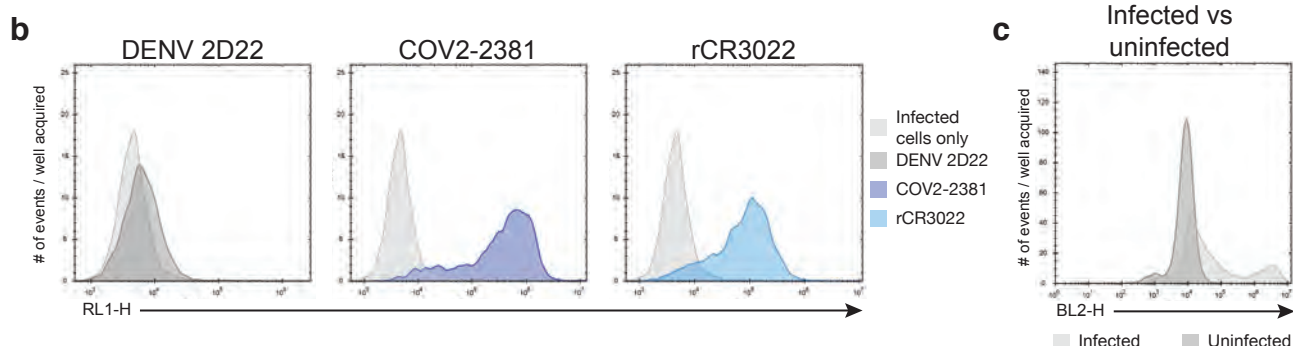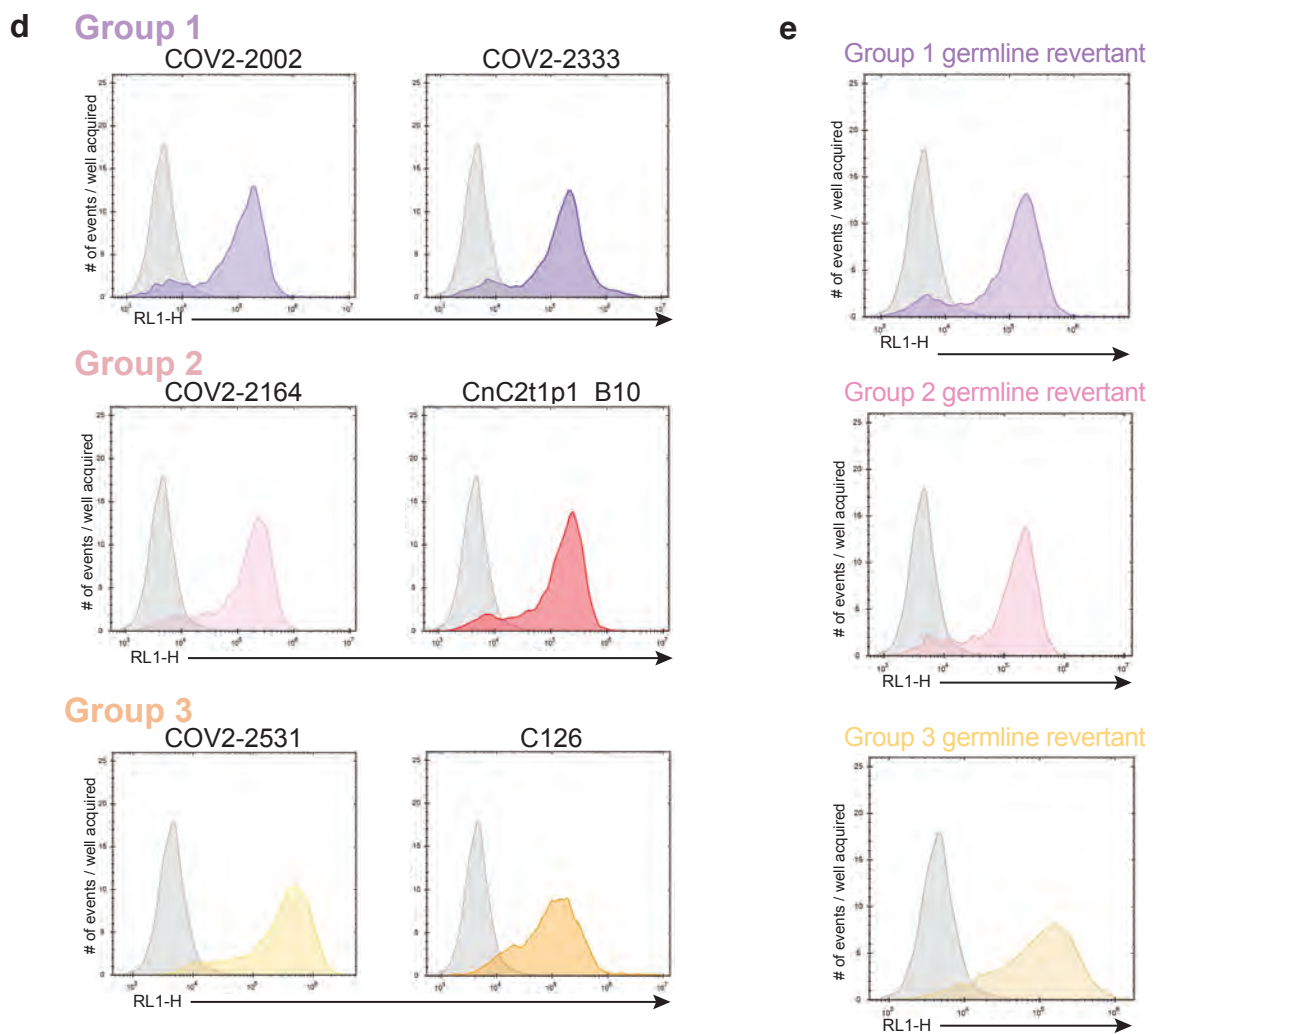

a

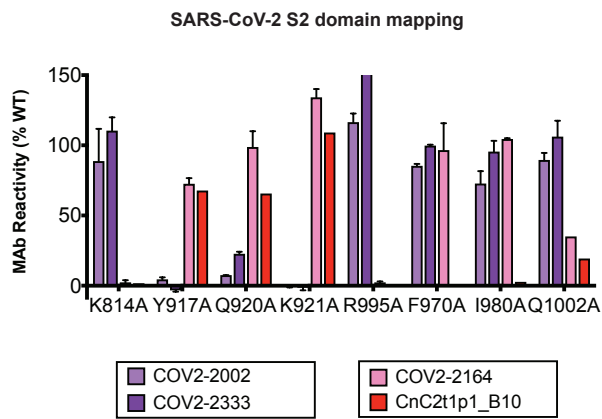

b

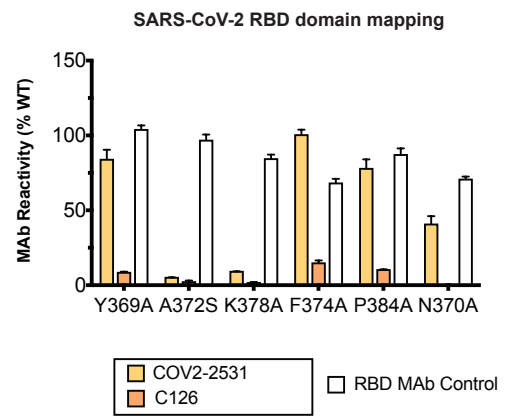



## Neutralizing potency

High

Low

Variability of epitope  
Low  
High

|                                                                                   |                                                                                 |
|-----------------------------------------------------------------------------------|---------------------------------------------------------------------------------|
| <b>Class 1</b><br>Neutralizing<br>Invariant residues<br>ex.: <i>IGHV1-58</i>      | <b>Class 3</b><br>Non-neutralizing<br>Invariant residues<br>ex.: <i>IGHV3-7</i> |
| <b>Class 2</b><br>Neutralizing<br>Variable residues<br>ex.: <i>IGHV3-53, 3-66</i> | <b>Class 4</b><br>Non-neutralizing<br>Variable residues                         |
